# Supplementary material for: Histamine H1 receptor deletion in cholinergic neurons induces sensorimotor gating ability deficit and social impairments in mice
Source: PubMed Central journal article supplement (PMC7893046; doi:10.1038/s41467-021-21476-x), 2021-02-18
Supplement: 41467_2021_21476_MOESM6_ESM.pdf [file 41467_2021_21476_MOESM6_ESM.pdf]

## Reporting Summary

Nature Research wishes to improve the reproducibility of the work that we publish. This form provides structure for consistency and transparency in reporting. For further information on Nature Research policies, see our [Editorial Policies](#) and the [Editorial Policy Checklist](#).

### Statistics

For all statistical analyses, confirm that the following items are present in the figure legend, table legend, main text, or Methods section.

n/a Confirmed

- |                                     |                                     |                                                                                                                                                                                                                                                            |
|-------------------------------------|-------------------------------------|------------------------------------------------------------------------------------------------------------------------------------------------------------------------------------------------------------------------------------------------------------|
| <input type="checkbox"/>            | <input checked="" type="checkbox"/> | The exact sample size ( $n$ ) for each experimental group/condition, given as a discrete number and unit of measurement                                                                                                                                    |
| <input type="checkbox"/>            | <input checked="" type="checkbox"/> | A statement on whether measurements were taken from distinct samples or whether the same sample was measured repeatedly                                                                                                                                    |
| <input type="checkbox"/>            | <input checked="" type="checkbox"/> | The statistical test(s) used AND whether they are one- or two-sided<br><i>Only common tests should be described solely by name; describe more complex techniques in the Methods section.</i>                                                               |
| <input type="checkbox"/>            | <input checked="" type="checkbox"/> | A description of all covariates tested                                                                                                                                                                                                                     |
| <input type="checkbox"/>            | <input checked="" type="checkbox"/> | A description of any assumptions or corrections, such as tests of normality and adjustment for multiple comparisons                                                                                                                                        |
| <input type="checkbox"/>            | <input checked="" type="checkbox"/> | A full description of the statistical parameters including central tendency (e.g. means) or other basic estimates (e.g. regression coefficient) AND variation (e.g. standard deviation) or associated estimates of uncertainty (e.g. confidence intervals) |
| <input type="checkbox"/>            | <input checked="" type="checkbox"/> | For null hypothesis testing, the test statistic (e.g. $F$ , $t$ , $r$ ) with confidence intervals, effect sizes, degrees of freedom and $P$ value noted<br><i>Give <math>P</math> values as exact values whenever suitable.</i>                            |
| <input checked="" type="checkbox"/> | <input type="checkbox"/>            | For Bayesian analysis, information on the choice of priors and Markov chain Monte Carlo settings                                                                                                                                                           |
| <input type="checkbox"/>            | <input checked="" type="checkbox"/> | For hierarchical and complex designs, identification of the appropriate level for tests and full reporting of outcomes                                                                                                                                     |
| <input checked="" type="checkbox"/> | <input type="checkbox"/>            | Estimates of effect sizes (e.g. Cohen's $d$ , Pearson's $r$ ), indicating how they were calculated                                                                                                                                                         |

*Our web collection on [statistics for biologists](#) contains articles on many of the points above.*

### Software and code

Policy information about [availability of computer code](#)

Data collection Behavioral assays: Data were collected blindly using the behavior tracking software ANY-maze (version 4.99). Confocal images were captured with Leica SP8. In vitro electrophysiology was performed by using an EPC10 patch-clamp amplifier (HEKA Instruments; Germany).

Data analysis Image analyses and quantification were performed using FIJI(Image J-win64). Individual events were counted and analyzed with MiniAnalysis software (version 6.0.3). Signals of Western blot were quantified with Image Pro Plus(version 6.0). Statistical comparisons were performed using Prism (version 7.0) or SPSS (version 17.0) with appropriate methods as indicated in figure legends.

For manuscripts utilizing custom algorithms or software that are central to the research but not yet described in published literature, software must be made available to editors and reviewers. We strongly encourage code deposition in a community repository (e.g. GitHub). See the Nature Research [guidelines for submitting code & software](#) for further information.

### Data

Policy information about [availability of data](#)

All manuscripts must include a [data availability statement](#). This statement should provide the following information, where applicable:

- Accession codes, unique identifiers, or web links for publicly available datasets
- A list of figures that have associated raw data
- A description of any restrictions on data availability

The datasets generated and/or analysed during the current study are available from the corresponding author upon reasonable request. Source data are provided with this paper.

## Field-specific reporting

Please select the one below that is the best fit for your research. If you are not sure, read the appropriate sections before making your selection.

Life sciences  Behavioural & social sciences  Ecological, evolutionary & environmental sciences

For a reference copy of the document with all sections, see [nature.com/documents/nr-reporting-summary-flat.pdf](https://www.nature.com/documents/nr-reporting-summary-flat.pdf)

## Life sciences study design

All studies must disclose on these points even when the disclosure is negative.

|                 |                                                                                                                                                               |
|-----------------|---------------------------------------------------------------------------------------------------------------------------------------------------------------|
| Sample size     | No statistical methods were used to pre-determine sample size. The sample size was determined according to previous studies (PMID: 27249678, PMID: 29531031)  |
| Data exclusions | Animals in which histological examination showed that viral targeting or the position of cannulas were in the incorrect location were excluded from analysis. |
| Replication     | The experiment for each study was successfully repeated for at least two times.                                                                               |
| Randomization   | All samples used in the study were randomly allocated into different experimental groups.                                                                     |
| Blinding        | The data collection and analysis were preformed by investigators blinded to the group allocation.                                                             |

## Reporting for specific materials, systems and methods

We require information from authors about some types of materials, experimental systems and methods used in many studies. Here, indicate whether each material, system or method listed is relevant to your study. If you are not sure if a list item applies to your research, read the appropriate section before selecting a response.

### Materials & experimental systems

| n/a                                 | Involved in the study                                           |
|-------------------------------------|-----------------------------------------------------------------|
| <input type="checkbox"/>            | <input checked="" type="checkbox"/> Antibodies                  |
| <input checked="" type="checkbox"/> | <input type="checkbox"/> Eukaryotic cell lines                  |
| <input checked="" type="checkbox"/> | <input type="checkbox"/> Palaeontology and archaeology          |
| <input type="checkbox"/>            | <input checked="" type="checkbox"/> Animals and other organisms |
| <input type="checkbox"/>            | <input checked="" type="checkbox"/> Human research participants |
| <input checked="" type="checkbox"/> | <input type="checkbox"/> Clinical data                          |
| <input checked="" type="checkbox"/> | <input type="checkbox"/> Dual use research of concern           |

### Methods

| n/a                                 | Involved in the study                           |
|-------------------------------------|-------------------------------------------------|
| <input checked="" type="checkbox"/> | <input type="checkbox"/> ChIP-seq               |
| <input checked="" type="checkbox"/> | <input type="checkbox"/> Flow cytometry         |
| <input checked="" type="checkbox"/> | <input type="checkbox"/> MRI-based neuroimaging |

## Antibodies

|                 |                                                                                                                                                                                                                                                                                                                                                                                                                                                                                                                                                                                                                                                                                                                                                                                                                                                                                                                                                                                                                                                                                                                                                                                                                                                                                                                                           |
|-----------------|-------------------------------------------------------------------------------------------------------------------------------------------------------------------------------------------------------------------------------------------------------------------------------------------------------------------------------------------------------------------------------------------------------------------------------------------------------------------------------------------------------------------------------------------------------------------------------------------------------------------------------------------------------------------------------------------------------------------------------------------------------------------------------------------------------------------------------------------------------------------------------------------------------------------------------------------------------------------------------------------------------------------------------------------------------------------------------------------------------------------------------------------------------------------------------------------------------------------------------------------------------------------------------------------------------------------------------------------|
| Antibodies used | <p>Immunostaining:<br/>Choline Acetyltransferase (ChAT, 1:100; AB144P; Millipore); Tyrosine Hydroxylase (TH; 1:1000; T8700; Sigma); Glutamate (1:1000; G6642; Sigma); GFP (GFP, 1:400; ab13970; Abcam); Living Colors® DsRed Polyclonal Antibody (mCherry, 1:200; 632496; Takara); Donkey anti-Goat Alexa Fluor 488 (1:400; A32814; Invitrogen); Donkey anti-Rabbit Alexa Fluor 488 (1:400; A-21206; Invitrogen); Donkey anti-Rabbit Alexa Fluor 594 (1:400; R37119; Invitrogen); Donkey anti-Chicken Alexa Fluor 488 (1:400; A-11039; Invitrogen); Fluorescent nuclear dye DAPI (F6057; Sigma).</p> <p>Western blot:<br/>Choline Acetyltransferase (ChAT, 1:1000; AB144P; Millipore) was used as primary antibody. Rabbit Anti-Goat IgG(H+L) HRP-labeled secondary antibody (RAG007, Multi Sciences, China) and Goat Anti-Mouse IgG(H+L) HRP-labeled secondary antibody (GAM007, Multi Sciences, China) were used at a dilution of 1:3000. The antibodies against GAPDH (KC-5G4; KangChen; China) was used for loading controls at a dilution of 1:3000.</p>                                                                                                                                                                                                                                                                             |
| Validation      | <p>All antibodies used in our study are either validated by the antibody companies.</p> <p>Immunostaining:<br/>ChAT: <a href="http://www.merckmillipore.com/CN/zh/product/Anti-Choline-Acetyltransferase-Antibody,MM_NF-AB144P?ReferrerURL=https%3A%2F%2Fcn.bing.com%2F&amp;bd=1">http://www.merckmillipore.com/CN/zh/product/Anti-Choline-Acetyltransferase-Antibody,MM_NF-AB144P?ReferrerURL=https%3A%2F%2Fcn.bing.com%2F&amp;bd=1</a><br/>TH: <a href="https://www.sigmaaldrich.com/catalog/product/sigma/t8700?lang=zh&amp;region=CN">https://www.sigmaaldrich.com/catalog/product/sigma/t8700?lang=zh&amp;region=CN</a><br/>Glutamate: <a href="https://www.sigmaaldrich.com/catalog/product/sigma/g6642?lang=zh&amp;region=CN">https://www.sigmaaldrich.com/catalog/product/sigma/g6642?lang=zh&amp;region=CN</a><br/>GFP: <a href="https://www.abcam.com/GFP-antibody-ab13970.html">https://www.abcam.com/GFP-antibody-ab13970.html</a><br/>mCherry: <a href="https://www.labome.com/product/Takara-Bio-Clontech/632496.html">https://www.labome.com/product/Takara-Bio-Clontech/632496.html</a><br/>Donkey anti-Goat Alexa Fluor 488: <a href="https://www.thermofisher.com/antibody/product/Donkey-anti-Goat-IgG-H-L-Highly-Cross-">https://www.thermofisher.com/antibody/product/Donkey-anti-Goat-IgG-H-L-Highly-Cross-</a></p> |

Adsorbed-Secondary-Antibody-Polyclonal/A32814

Donkey anti-Rabbit Alexa Fluor 488: <https://www.thermofisher.com/antibody/product/Donkey-anti-Rabbit-IgG-H-L-Highly-Cross-Adsorbed-Secondary-Antibody-Polyclonal/A-21206>

Donkey anti-Rabbit Alexa Fluor 594: <https://www.thermofisher.com/cn/zh/antibody/product/Donkey-anti-Rabbit-IgG-H-L-Secondary-Antibody-Polyclonal/R37119>

Donkey anti-Chicken Alexa Fluor 488: <https://www.thermofisher.com/cn/zh/antibody/product/Goat-anti-Chicken-IgY-H-L-Secondary-Antibody-Polyclonal/A-11039>

DAPI: <https://www.sigmaldrich.com/catalog/product/sigma/f6057?lang=zh&region=CN>

Western blot:

ChAT: [http://www.merckmillipore.com/CN/zh/product/Anti-Choline-Acetyltransferase-Antibody,MM\\_NF-AB144P?ReferrerURL=https%3A%2F%2Fcn.bing.com%2F&bd=1](http://www.merckmillipore.com/CN/zh/product/Anti-Choline-Acetyltransferase-Antibody,MM_NF-AB144P?ReferrerURL=https%3A%2F%2Fcn.bing.com%2F&bd=1)

Anti-goat IgG, HRP-linked Antibody: <http://www.liankebio.com/product-60410.html>

Anti-mouse IgG, HRP-linked Antibody: <http://www.liankebio.com/product-60308.html>

GAPDH: <http://www.aksomics.com/products/westernblot-internal-reference-1.html>

## Animals and other organisms

Policy information about [studies involving animals](#); [ARRIVE guidelines](#) recommended for reporting animal research

### Laboratory animals

Hrh1fl/fl mice were commercially generated by standard homologous recombination at the Nanjing Biomedical Research Institute of Nanjing University, Nanjing, China. ChAT-Cre mice (stock number: 006410), DAT-Cre mice (stock number: 006660), CaMKII $\alpha$ -Cre mice (stock number: 005359) and Ai14 mice (stock number: 007914) were genotyped according to the protocols provided by Jackson Laboratories. All mice were bred onto a C57BL/6J genetic background. Male mice 2-4 months of age were used in all experiments. All mice were maintained under a 12 h light-dark cycle (light on from 8:00 a.m. to 8:00 p.m.) with ad libitum access to food and water. All behavior experiments were performed each day between 10:00 a.m. and 7:00 p.m.

### Wild animals

This study did not involve wild animals.

### Field-collected samples

This study did not involve samples collected from the field.

### Ethics oversight

The use and care of the mice were in accordance with the guidelines of the Animal Advisory Committee of Zhejiang University and the US National Institutes of Health Guidelines for the Care and Use of Laboratory Animals. All procedures were approved by the Animal Advisory Committee of Zhejiang University.

Note that full information on the approval of the study protocol must also be provided in the manuscript.

## Human research participants

Policy information about [studies involving human research participants](#)

### Population characteristics

The schizophrenia patients were diagnosed according to the Diagnostic and Statistical Manual of Mental Disorders IV by qualified psychiatrists using the extensive medical records of the NBB, which also contained well-documented diagnoses and onset of schizophrenia from psychiatric clinics. The schizophrenia patients and controls were matched for sex, age, postmortem delay (PMD), clock time and month of death, cerebrospinal fluid (CSF) pH, brain weight and Braak stage of Alzheimer pathology. Detailed clinico-pathological information and p-values of the matched parameter are given in Supplementary Data 1.

### Recruitment

The schizophrenia patients recruited were diagnosed according to the Diagnostic and Statistical Manual of Mental Disorders IV by qualified psychiatrists using the extensive medical records of the NBB, which also contained well-documented diagnoses and onset of schizophrenia from psychiatric clinics. Exclusion criteria were any other neurological or psychiatric diseases. Controls had to be non-demented and had no known history of a psychiatric disorder. The schizophrenia patients and controls were matched for sex, age, postmortem delay (PMD), clock time and month of death, cerebrospinal fluid (CSF) pH, brain weight and Braak stage of Alzheimer pathology. These procedures were performed by a staff member of the NBB who was not involved in the experiments in order to prevent any bias.

### Ethics oversight

All study protocols were complied with the guidelines for the conduct of research involving human subjects as established by the Ethics Committee of Zhejiang University School of Medicine. All procedures were approved by the Ethics Committee of Zhejiang University School of Medicine.

Note that full information on the approval of the study protocol must also be provided in the manuscript.
